# Supplementary material
Source: Springer Nature journal article supplement (https://www.springermedizin.de/resource/supplementary/13075_2012_4013_MOESM11_ESM.pdf/9695840)

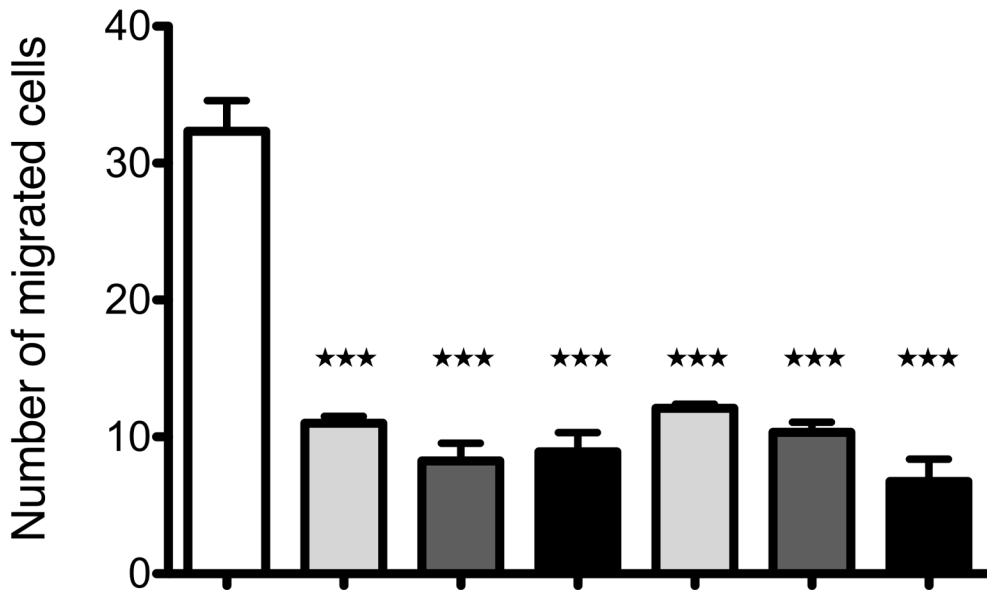

|                       |   |     |   |    |   |    |     |
|-----------------------|---|-----|---|----|---|----|-----|
| IL-1 $\beta$ [ng/ml]  | 0 | 0.1 | 1 | 10 | 0 | 0  | 0   |
| TNF- $\alpha$ [ng/ml] | 0 | 0   | 0 | 0  | 1 | 10 | 100 |

Supplement: MOESM11 [file 9695840]
